# Supplementary material
Source: ML conference proceedings conference paper supplement (https://aclanthology.org/P19-1567)
Supplement: Software [file metrics.xlsx]

## Sheet: source_based_avg_embedding
30627	11.0073	7.76885	13.0076	87.6852	130.778	0.0923584	0.325296	0.596538	0.538481	0.578498	0.567766	0.0382034	0.232853	0.763872	0.636863
33414	10.9724	7.77324	13.0428	87.5957	130.865	0.0857531	0.303112	0.599061	0.548329	0.583938	0.563784	0.0401321	0.24291	0.802437	0.664369
36202	10.6352	7.81262	13.1205	85.4328	127.204	0.0685922	0.268046	0.603232	0.553886	0.590739	0.563042	0.0418108	0.258505	0.836002	0.707022
38991	10.9891	7.83896	13.176	88.6654	132.436	0.0673963	0.272082	0.612213	0.560434	0.597809	0.564944	0.0429541	0.264117	0.858862	0.722372
41779	12.1514	7.90243	13.2475	98.3917	148.129	0.0661763	0.256867	0.626544	0.570662	0.605336	0.577186	0.0408055	0.259417	0.815903	0.709518
44566	11.7987	7.90726	13.2926	95.7554	144.171	0.0557772	0.234233	0.630436	0.576704	0.610903	0.573201	0.0422132	0.266465	0.844049	0.728793
47352	11.6116	7.90965	13.3192	94.4754	142.056	0.0506276	0.215359	0.631304	0.581796	0.615729	0.569171	0.0435421	0.2756	0.870621	0.753778
50139	12.1715	7.93851	13.3562	99.206	149.734	0.0512771	0.228241	0.639205	0.588724	0.620321	0.574988	0.0418851	0.272398	0.837489	0.745021
52925	11.8678	7.94843	13.3964	97.0217	146.413	0.0466882	0.221723	0.642402	0.591565	0.622415	0.573678	0.0434141	0.281864	0.868062	0.77091
55711	12.0963	7.98303	13.443	99.204	149.964	0.0491925	0.210748	0.645868	0.594916	0.62638	0.572939	0.043968	0.284667	0.879136	0.778577
58498	12.021	7.97888	13.4343	98.7662	148.967	0.0476796	0.216295	0.645735	0.595591	0.628133	0.570737	0.0443998	0.285163	0.88777	0.779933
61286	11.9955	7.98769	13.4635	98.4705	148.701	0.0420238	0.204999	0.652095	0.599384	0.630575	0.57515	0.0446792	0.28764	0.893357	0.786708
64076	11.9271	7.98745	13.4608	97.9727	147.86	0.0395082	0.206605	0.649413	0.60028	0.630444	0.57262	0.0451675	0.290473	0.903119	0.794457
66865	12.4787	8.00315	13.4655	102.544	155.011	0.0519315	0.217824	0.652166	0.601463	0.63123	0.576477	0.0436415	0.282248	0.872608	0.771961
69653	12.3442	8.02051	13.4951	101.642	153.49	0.0395606	0.19952	0.653105	0.602672	0.631983	0.575326	0.0443862	0.289774	0.887498	0.792544

## Sheet: both_sent_eval
46641	12.8779	8.01676	13.4653	105.382	159.557	0.0606079	0.244283	0.645414	0.58933	0.619958	0.583964	0.0421165	0.268611	0.842115	0.734662
49102	12.4235	8.00382	13.4819	101.667	154.009	0.0529344	0.230561	0.644743	0.590931	0.622874	0.580363	0.0432557	0.276261	0.864894	0.755585
54026	12.1139	8.05376	13.5649	99.9471	150.801	0.0423956	0.201444	0.64594	0.594719	0.625399	0.575647	0.0456416	0.291592	0.912599	0.797517
56485	12.5296	8.06103	13.5885	103.341	156.446	0.0512637	0.216957	0.648259	0.59535	0.626307	0.57764	0.0445073	0.285209	0.889919	0.780059
61407	12.7042	8.08586	13.5941	104.849	158.684	0.0518667	0.213059	0.654955	0.598216	0.628381	0.582835	0.0440003	0.28351	0.879782	0.775413
66329	12.6183	8.06233	13.5817	103.971	157.536	0.0512251	0.215084	0.652759	0.599021	0.629448	0.582361	0.0440191	0.283555	0.880158	0.775536
71246	12.6475	8.06603	13.5678	104.318	157.868	0.0475564	0.214985	0.653901	0.600333	0.629041	0.581492	0.0442239	0.286108	0.884253	0.782518
76172	12.6029	8.12437	13.6843	104.66	158.179	0.0415284	0.199441	0.655393	0.598944	0.627737	0.583851	0.045031	0.2931	0.900391	0.801641
81096	12.6019	8.10093	13.6446	104.271	157.596	0.0496099	0.213291	0.652774	0.599291	0.628608	0.58108	0.0442434	0.288322	0.884643	0.788574
86030	12.5777	8.10414	13.6431	104.037	157.486	0.044198	0.204198	0.655096	0.599909	0.629198	0.582863	0.0448128	0.288436	0.896028	0.788884
90959	12.7253	8.11658	13.6544	105.519	159.607	0.0456066	0.209475	0.655986	0.599608	0.62985	0.583543	0.0445108	0.289832	0.889989	0.792703
95888	12.9434	8.11315	13.6372	107.214	162.361	0.0516054	0.223591	0.65704	0.600469	0.630442	0.582968	0.044163	0.285912	0.883034	0.781981
100000	12.7121	8.11977	13.6417	105.429	159.312	0.0448755	0.20817	0.656816	0.6014	0.63061	0.584353	0.0449753	0.292864	0.899276	0.800994

## Sheet: base
22001	9.7986	7.60387	12.7258	76.7587	112.157	0.114105	0.352098	0.590908	0.533082	0.583524	0.568091	0.0362004	0.222134	0.723824	0.607546
33001	11.2096	7.80328	13.1462	90.0837	134.558	0.0545336	0.234288	0.641982	0.588655	0.626754	0.578257	0.0405578	0.262039	0.810949	0.716687
44001	11.4686	7.92985	13.3843	93.7339	140.301	0.0341354	0.193136	0.659634	0.60982	0.642012	0.57976	0.0440175	0.290233	0.880126	0.793799
66001	11.54	7.98222	13.437	95.0845	142.035	0.0333173	0.179233	0.668554	0.618405	0.649038	0.579349	0.0454057	0.299154	0.907882	0.818199
88001	11.6722	8.00068	13.4637	96.5345	144.187	0.0340003	0.184072	0.670597	0.619024	0.65075	0.581228	0.0454705	0.304145	0.909178	0.831849
109001	11.2844	7.9557	13.4214	92.8087	138.815	0.0300579	0.168522	0.666953	0.618832	0.649394	0.576599	0.0460614	0.301098	0.920994	0.823515
142001	11.1446	7.93629	13.3654	91.6626	136.694	0.0277855	0.171266	0.667683	0.619147	0.649998	0.576107	0.0461124	0.302197	0.922013	0.826522
175001	11.1769	7.96454	13.4102	92.0909	137.252	0.0284836	0.16884	0.668029	0.619318	0.649413	0.575425	0.0452951	0.298486	0.90567	0.816371
218001	10.9782	7.9534	13.3854	90.4466	134.576	0.0278355	0.16523	0.665337	0.616455	0.648011	0.574312	0.0459839	0.304572	0.919443	0.833017
225001	10.9235	7.95557	13.3955	90.1016	134.114	0.0278199	0.170317	0.663936	0.61588	0.648738	0.572562	0.0467619	0.306162	0.934999	0.837366

## Sheet: base_with_numbers
2402	14.9187	0.242993	7.08265	0.00957639	10.7493	0.0105906	108.813	1.98189	149.587	2.6683	1.82996	0.0287365	3.27743	0.0639609	0.559342	0.00256059	0.48206	0.00220424	0.538926	0.00201068	0.555695	0.00255291	0.00109897	0	0.00354175	0	0.0219739	0	0.00968684	0
4875	6.82885	0.0929069	6.73023	0.0162501	11.0997	0.0228396	47.6117	0.650943	65.4876	1.0113	1.15024	0.019655	1.89624	0.0372175	0.47997	0.00304403	0.453686	0.00245814	0.537969	0.00239832	0.479478	0.00307712	0.0086302	0	0.0354258	0	0.17256	0	0.0968911	0
7344	11.6224	0.280407	6.9466	0.0161957	11.4657	0.0237554	78.6831	1.50066	117.946	2.68024	1.06343	0.0181723	1.99177	0.0340683	0.537165	0.0027416	0.498408	0.0024593	0.55021	0.0022746	0.540199	0.00279653	0.0103798	0	0.045574	0	0.207544	0	0.124647	0
9808	11.9395	0.252121	7.24989	0.0176507	11.9343	0.0271458	85.1324	1.48972	127.464	2.56699	0.612702	0.0126063	1.40819	0.0258171	0.558832	0.00282348	0.499909	0.00246837	0.552444	0.00230693	0.567399	0.00285558	0.0167845	0	0.0831283	0	0.335604	0	0.227359	0
12265	9.93641	0.299737	7.2276	0.022074	12.0783	0.0330466	66.5708	1.30741	102.035	2.7409	0.495118	0.0114339	1.22989	0.0217628	0.531409	0.00306309	0.496982	0.00265792	0.553391	0.00256145	0.531535	0.00297172	0.0235128	0	0.11355	0	0.470135	0	0.310565	0
14726	8.64717	0.151205	7.31779	0.0199315	12.1754	0.0325339	63.9812	0.938438	93.1824	1.61641	0.318868	0.00921882	0.828677	0.0192687	0.543466	0.00309857	0.500125	0.00277007	0.554914	0.00260474	0.537959	0.00293773	0.0302852	0	0.154076	0	0.605549	0	0.421404	0
17179	9.87737	0.182371	7.41245	0.020255	12.3344	0.0326977	73.3967	1.15609	108.614	1.98965	0.292636	0.00859172	0.763997	0.0168772	0.55549	0.00318294	0.506269	0.00290518	0.55834	0.00271345	0.548072	0.00289725	0.0301919	0	0.158655	0	0.603684	0	0.433929	0
19635	8.57118	0.112762	7.41889	0.0206714	12.4217	0.0336953	65.3712	0.937692	94.8975	1.47868	0.185153	0.00747671	0.548732	0.0157909	0.549464	0.00335144	0.510525	0.00301211	0.560843	0.00282727	0.538644	0.00302665	0.0346379	0	0.190299	0	0.692581	0	0.520476	0
22082	10.7993	0.140784	7.57727	0.0197884	12.5868	0.0325714	84.1954	1.20837	124.394	1.9037	0.193055	0.00700125	0.517275	0.0144918	0.57817	0.00330818	0.518911	0.0030883	0.565955	0.00287196	0.568667	0.00294337	0.0335436	0	0.195471	0	0.670701	0	0.534622	0
26998	10.3424	0.143179	7.6078	0.0205128	12.6772	0.0335141	81.2071	1.25895	119.794	1.96698	0.136198	0.00623479	0.400668	0.0128443	0.580578	0.00355423	0.528935	0.00338598	0.574148	0.00313814	0.558956	0.00294809	0.0368462	0	0.216698	0	0.736737	0	0.592678	0
31904	10.8708	0.152309	7.6601	0.0203332	12.8834	0.0333869	85.6819	1.32125	127.993	2.10486	0.114653	0.00569843	0.360958	0.0120208	0.591664	0.00372926	0.538544	0.00360319	0.582428	0.00335105	0.561524	0.00295398	0.0379391	0	0.225691	0	0.758588	0	0.617275	0
36822	11.0223	0.153194	7.74778	0.0209203	12.9895	0.0338787	88.0994	1.37957	131.247	2.1661	0.0978307	0.00509598	0.315719	0.0109368	0.603198	0.00390209	0.549551	0.00388177	0.590634	0.00361861	0.564084	0.00296191	0.0405938	0	0.243603	0	0.811669	0	0.666264	0
41741	11.4381	0.16658	7.83297	0.0215934	13.1309	0.0345443	92.5572	1.49283	138.592	2.38601	0.0719688	0.00459545	0.257155	0.0100552	0.618843	0.00410831	0.564448	0.00416917	0.60276	0.00389254	0.568126	0.0029413	0.0420912	0	0.260281	0	0.841609	0	0.71188	0
51563	11.8123	0.171273	7.8754	0.0214739	13.242	0.0344505	96.0428	1.55618	144.664	2.50177	0.0587226	0.00424542	0.231227	0.00928266	0.641874	0.00441317	0.590962	0.00462108	0.624499	0.00429054	0.572009	0.00292671	0.0437682	0	0.274756	0	0.87514	0	0.751469	0
61415	11.67	0.174782	7.97133	0.021985	13.3944	0.0351777	96.0271	1.60152	144.227	2.55948	0.0418941	0.00370926	0.1983	0.00857657	0.653657	0.00459132	0.605323	0.00483576	0.635851	0.00451382	0.571267	0.00294146	0.0465423	0	0.292728	0	0.930609	0	0.800624	0
71275	11.5006	0.17316	7.99649	0.0222962	13.4422	0.0356482	95	1.58833	142.396	2.54264	0.0373419	0.00355612	0.188408	0.00844883	0.65541	0.00468794	0.608061	0.00493734	0.64021	0.00459783	0.567494	0.00297805	0.0474782	0	0.303664	0	0.949323	0	0.830534	0
81097	11.9313	0.174409	7.99983	0.0218085	13.4785	0.0348243	98.4411	1.60263	148.452	2.57334	0.0376442	0.00349201	0.183367	0.00812713	0.663734	0.0046565	0.613437	0.00494904	0.644866	0.00459231	0.574685	0.00292735	0.0460521	0	0.295905	0	0.920808	0	0.809312	0
90920	12.0008	0.172596	8.02857	0.0216146	13.5065	0.0346991	99.1601	1.58551	149.358	2.53902	0.0351754	0.00359563	0.178759	0.00795753	0.665822	0.00464296	0.6162	0.00494088	0.644994	0.00463054	0.574668	0.00293139	0.0464225	0	0.297984	0	0.928214	0	0.814999	0
104981	12.0487	0.175636	8.06295	0.0217869	13.5592	0.0347858	100.078	1.62527	150.591	2.60709	0.0332182	0.00329043	0.178167	0.00803638	0.666918	0.0046574	0.616674	0.00497845	0.645904	0.00464465	0.576532	0.00289868	0.047056	0	0.302165	0	0.94088	0	0.826433	0
120235	12.0893	0.177084	8.02009	0.0217152	13.506	0.0349295	100.089	1.63287	151.172	2.62669	0.0359888	0.00338859	0.177402	0.00798697	0.666607	0.00469548	0.61813	0.00498873	0.646875	0.00465409	0.574153	0.00293773	0.0460918	0	0.299132	0	0.921601	0	0.818138	0
135572	12.1451	0.176111	8.06535	0.0217978	13.5652	0.0350174	100.958	1.62415	152.16	2.60601	0.0346894	0.00324681	0.17484	0.00778411	0.666295	0.00468842	0.617061	0.00500475	0.645672	0.004665	0.574727	0.00292345	0.0469015	0	0.303289	0	0.937791	0	0.829508	0
150918	12.2187	0.175848	8.06703	0.0215717	13.564	0.0348802	101.464	1.61866	152.937	2.59565	0.0342078	0.00333896	0.17003	0.0078049	0.669826	0.0046529	0.619357	0.0049713	0.648064	0.00464161	0.576461	0.00292653	0.0463472	0	0.300669	0	0.926707	0	0.822341	0
166277	12.0962	0.172616	8.04475	0.0215604	13.524	0.0349991	100.14	1.58717	150.959	2.5468	0.0324776	0.00340377	0.172844	0.00796972	0.669544	0.00465388	0.618642	0.00498564	0.648501	0.0046385	0.576117	0.00290358	0.0463587	0	0.300464	0	0.926938	0	0.821782	0
181743	12.0669	0.17601	8.04032	0.0219071	13.5252	0.0351732	99.9376	1.6152	150.655	2.59848	0.0334193	0.00332586	0.170839	0.00778809	0.66868	0.00467403	0.61949	0.00499278	0.647247	0.00466539	0.574204	0.00291204	0.0464986	0	0.299727	0	0.929735	0	0.819765	0
197231	12.2381	0.174689	8.06107	0.0217562	13.5472	0.0348155	101.451	1.60202	152.761	2.56882	0.0319183	0.00331514	0.169718	0.00797597	0.67042	0.00465953	0.618942	0.00497866	0.647851	0.00465013	0.578088	0.00291097	0.0462194	0	0.299923	0	0.924153	0	0.820302	0
212863	12.143	0.171652	8.07744	0.0214322	13.5773	0.0344249	100.721	1.57406	151.692	2.52358	0.0297576	0.00328754	0.172129	0.00799581	0.670628	0.00465092	0.618663	0.00499503	0.647081	0.00467164	0.577502	0.00289873	0.0465721	0	0.301348	0	0.931205	0	0.8242	0
228509	11.9976	0.171184	8.05627	0.0218666	13.5545	0.0348678	99.4938	1.57874	149.875	2.52947	0.0303375	0.00343573	0.165337	0.0078275	0.668939	0.00467912	0.618379	0.00500665	0.646804	0.0046738	0.575131	0.00290924	0.0470444	0	0.303329	0	0.940648	0	0.829618	0
244148	12.1496	0.173904	8.0835	0.0219662	13.5877	0.0348032	101.046	1.59913	151.888	2.55692	0.0319299	0.00323818	0.1701	0.00784655	0.669062	0.00469746	0.617242	0.00502994	0.646124	0.00469136	0.575818	0.00294958	0.046465	0	0.304199	0	0.929063	0	0.831997	0
259787	12.1251	0.177349	8.06447	0.0217948	13.5489	0.0346619	100.741	1.64055	151.647	2.62955	0.0326123	0.00335224	0.170443	0.00792307	0.669364	0.00467132	0.617515	0.00499456	0.646466	0.00466594	0.576274	0.00292808	0.0467507	0	0.302003	0	0.934775	0	0.825992	0
275414	12.1525	0.172849	8.09118	0.0216625	13.5952	0.0346233	101.183	1.59793	152.235	2.55722	0.0304866	0.00319526	0.168263	0.00776356	0.66887	0.00466956	0.617323	0.00500107	0.646094	0.00467792	0.576668	0.00292457	0.0459431	0	0.302422	0	0.918627	0	0.827136	0
291016	11.9534	0.1734	8.06428	0.0216627	13.5503	0.0345239	99.2499	1.59887	149.155	2.56597	0.0315409	0.00330855	0.169272	0.00777103	0.66823	0.004695	0.616802	0.0050206	0.647137	0.00467115	0.574248	0.0029362	0.0464584	0	0.302075	0	0.928931	0	0.826189	0
300000	12.0604	0.17296	8.06914	0.0218244	13.5633	0.0347594	100.266	1.59615	150.686	2.55484	0.0317525	0.0032842	0.169813	0.00780432	0.669471	0.00467517	0.618298	0.00501849	0.647348	0.00466566	0.57618	0.00291438	0.04713	0	0.305773	0	0.942361	0	0.836302	0
